# Supplementary material for: Achilles’ Ear? Inferior Human Short-Term and Recognition Memory in the Auditory Modality
Source: PLOS journal article supplement (doi:10.1371/journal.pone.0089914), 2014-02-26
Supplement: S3 (10.1371/journal.pone.0089914.s003) [file journal.pone.0089914.s003]

**Table S1. List of stimuli<sup>a</sup> used in Experiment 2**

| Auditory stimuli (sound recordings) |                        | Tactile stimuli (physical objects) |                          | Visual stimuli (silent videos) |                      |
|-------------------------------------|------------------------|------------------------------------|--------------------------|--------------------------------|----------------------|
| Alarm clock                         | Gun shots              | Action figure                      | Light bulb               | American flag                  | Jumping a hurdle     |
| Auctioneer                          | Harmonica              | Balloon                            | Lollipop / sucker        | Apples                         | Karate               |
| Baby crying                         | Heart beat             | Battery                            | Magazine                 | Baby                           | Kite flying          |
| Bagpipes                            | Heavy breathing        | Beads                              | Magnifying glass         | Bald eagle                     | Ladder               |
| Band instruments                    | Helicopter             | Beer / soda bottle                 | Marker / highlighter     | Basketball                     | Lifting weights      |
| Banjo                               | Horse whinny           | Belt                               | Medicine bottle          | Beer                           | Marbles              |
| Bees buzzing                        | Jack hammer            | Bolt                               | Note pad                 | Bouncy castle                  | Microwave            |
| Bells                               | Laugh                  | Book                               | Pacifier                 | Bow and arrow                  | Monkey               |
| Bomb dropping                       | Machine gun            | Bowl                               | Padlock                  | Brain                          | Onion                |
| Breaking glass                      | Maracas                | Butter knife                       | Paint brush              | Bread                          | Orange               |
| Broom sweeping                      | Motorcycle             | Calculator                         | Paper clip               | Cake                           | Pancakes             |
| Brushing teeth                      | Opera singer           | Camera                             | Pencil                   | Camera                         | Paper airplane       |
| Burp                                | Piano                  | Candle                             | Plastic cup              | Cash                           | Pineapple            |
| Car accident                        | Pig                    | Candy bar                          | Plate                    | Cement                         | Police cars          |
| Car starting                        | Police car sirens      | Canned food                        | Playing cards            | Chair spinning                 | Pond                 |
| Cars honking                        | Pots and pans          | Cardboard box                      | Q tips                   | Chalkboard                     | Popcorn              |
| Cash register                       | Racecar                | Cigarette lighter                  | Rubber band              | City                           | Potato peeling       |
| Cat                                 | Radio tuning           | Coat hanger                        | Scissors                 | Clock                          | Printer              |
| Cell phone ring                     | Saxophone              | Coffee mug                         | Screw driver             | Clouds                         | Ramen noodles        |
| Cell phone vibrating                | Sea lion               | Coins                              | Shoe                     | Cookies                        | Rat                  |
| Chainsaw                            | Seagulls               | Compact disc                       | Shot glass               | Corn                           | Record spinning      |
| Cheering                            | Sheep                  | Computer keyboard                  | Soda can                 | Dominos                        | Rope climbing        |
| Chewing                             | Siren                  | Computer mouse                     | Sponge                   | Doughnuts                      | Rubber band ball     |
| Chicken                             | Snapping               | Crayons                            | Spoon                    | Drinking fountain              | Scuba diver          |
| Coins                               | Snoring                | Credit card                        | Spray bottle             | Drumming                       | Shaving              |
| Conversation                        | Soda can               | DVD case                           | Stapler                  | Ducks                          | Shooting guns        |
| Coughing                            | Sword fight            | Fingernail clippers                | Sticky notes             | Earth                          | Shuffling cards      |
| Cows                                | Talking on radio       | Flash drive                        | String / Spool of string | Egg                            | Snake                |
| Crickets                            | Teapot                 | Flashlight                         | Tape dispenser           | Eye                            | Snow shoveling       |
| Crows                               | Telephone              | Flip flop                          | Telephone                | Figure skating                 | Soccer kick          |
| Cuckoo clock                        | Throat clearing        | Frisbee                            | Tennis ball              | Fire extinguisher              | Soda can crushed     |
| DJ turntable scratching             | Thunderstorm           | Frying pan or pot                  | Thimble                  | Fireplace                      | Space shuttle launch |
| Dog                                 | Toilet flush           | Glasses                            | Three ring binder        | Fire truck                     | Speedboat            |
| Donkey                              | Train                  | Glove                              | Tissue box               | Flash drive                    | Spider               |
| Door opening                        | Truck in reverse       | Glue bottle                        | Toilet paper roll        | Flower                         | Stethoscope          |
| Doorbell                            | Typewriter             | Hairbrush                          | Tongs                    | Football catch                 | Swing set            |
| Drumming                            | Vacuum                 | Hammer                             | Toothbrush               | Frisbee throw                  | Toaster              |
| Duct tape                           | Violin                 | Hand soap dispenser                | Toothpaste               | Frog                           | Tomato               |
| Electric guitar                     | Water dripping         | Hat                                | Toy car                  | Golf swing                     | Toothbrush           |
| Elephant                            | Whip cracking          | Headphones                         | Toy watch                | Guitar                         | Tractor              |
| Farts                               | Wind blowing           | Ice cube tray                      | Video game controller    | Headphones                     | Trampoline           |
| Fireworks                           | Wind chimes            | Jar / Jam jar                      | Wash rag / hand towel    | Hockey slap shot               | Turtle               |
| Flute                               | Wolves howling         | Ketchup bottle                     | Water bottle             | Horse jumping                  | Tying shoes          |
| Footsteps                           | Writing on chalk board | Ketchup packets                    | Whisk                    | Hot air balloon                | Walk sign            |
| Glass clinking                      | Yodeling               | Legos                              | Wrench                   | Jack-o-lantern                 | Water bottles        |

<sup>a</sup>Stimulus names are as they appeared in the object identification task
